# Supplementary material for: Evaluating Manganese, Zinc, and Copper Metal Toxicity on SH-SY5Y Cells in Establishing an Idiopathic Parkinson’s Disease Model
Source: MDPI journal article supplement (doi:10.3390/ijms242216129), 2023-11-09

Supplemental Information

**Supplemental Table S1.** LC<sub>10</sub> and LC<sub>50</sub> molarity values to determine finalized dosing averages for Manganese Chloride, Zinc Chloride, and Copper Chloride after 24 h exposure on SH-SY5Y cells.

|             | MnCl <sub>2</sub> (μM) |                  | ZnCl <sub>2</sub> (μM) |                  | CuCl <sub>2</sub> (μM) |                  |
|-------------|------------------------|------------------|------------------------|------------------|------------------------|------------------|
|             | LC <sub>10</sub>       | LC <sub>50</sub> | LC <sub>10</sub>       | LC <sub>50</sub> | LC <sub>10</sub>       | LC <sub>50</sub> |
| 1           | 12.32                  | 142.96           | 323.16                 | 338.15           | 13.75                  | 758.34           |
| 2           | 10.82                  | 137.77           | 302.48                 | 318.82           | 13.33                  | 692.85           |
| 3           | 13.55                  | 148.80           | 293.86                 | 313.74           | 10.43                  | 716.81           |
| AVG ± STDEV | 12.23 ± 1.37           | 143.18 ± 5.52    | 306.50 ± 15.06         | 323.60 ± 12.88   | 13.17 ± 2.66           | 722.67 ± 33.14   |

**Supplemental Figure S1.** Live metabolic oxygen consumption rate and extracellular acidification rate after 24 h treatments

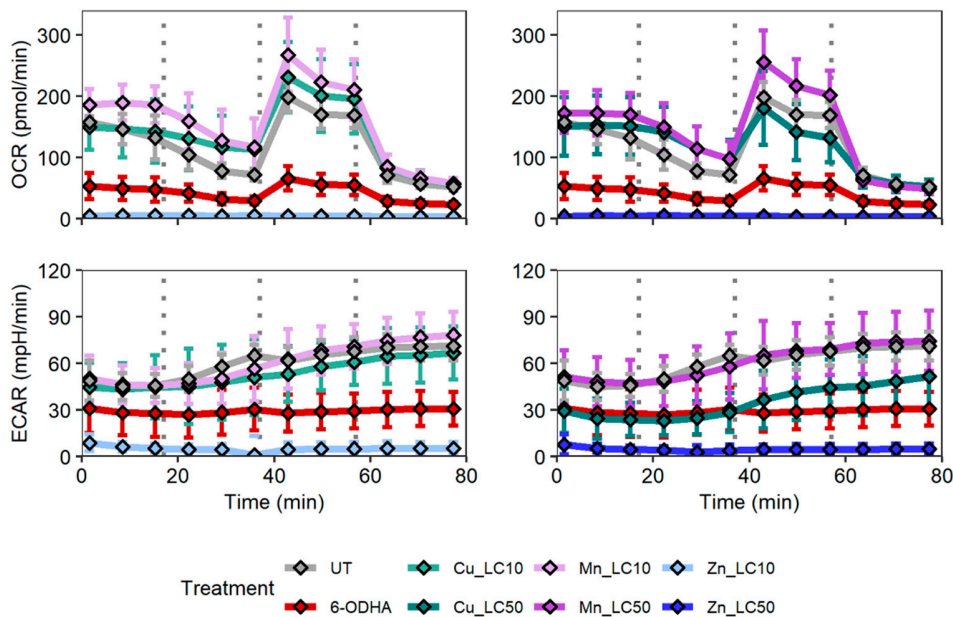

Supplement: s1 [file s1]
